# Supplementary material for: Reductions in malaria in pregnancy and adverse birth outcomes following indoor residual spraying of insecticide in Uganda
Source: Springer Nature journal article supplement (doi:10.1186/s12936-016-1489-x), 2016-08-26

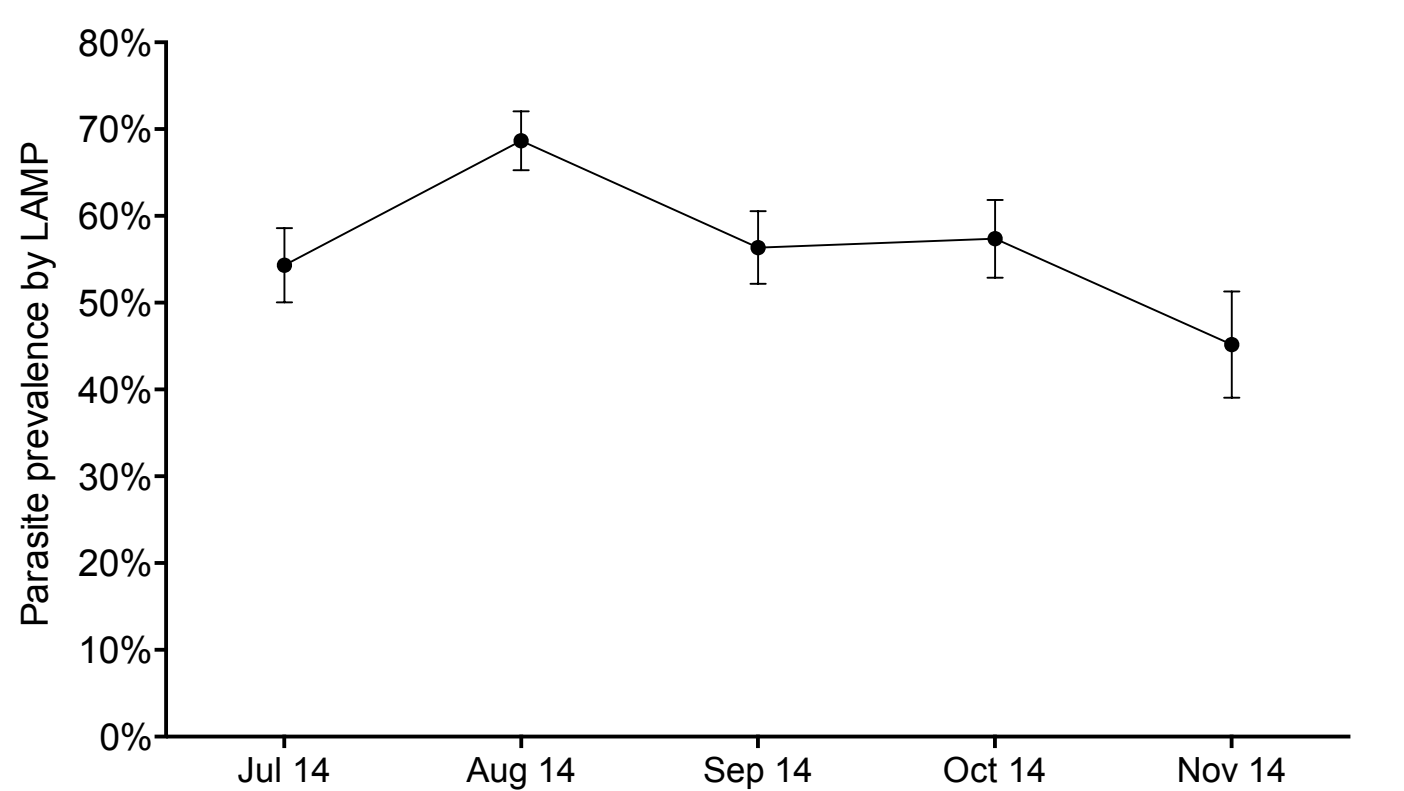

Supplement: MOESM2 [file 10624942]
