# Supplementary material for: Reductions in malaria in pregnancy and adverse birth outcomes following indoor residual spraying of insecticide in Uganda
Source: Malar J. 2016 Aug 26;15(1):437. doi: 10.1186/s12936-016-1489-x (PMC5002129; doi:10.1186/s12936-016-1489-x)
Supplement: Supplementary file 1 — 10.1186/s12936-016-1489-x Parasite prevalence during pregnancy by calendar month at enrolment and visits prior to study drug initiation. Shown is the predicted probability of having a positive (+) LAMP result during pregnancy at enrolment and before initiation of study drugs. Parasite prevalence point estimates and standard errors obtained using generalized estimating equations after adjustment for gravidity and age. [file 12936_2016_1489_MOESM1_ESM.docx]

**Supplementary Table. Sensitivity Analysis: Estimation of effect of any IRS vs no IRS protection on outcomes measured at birth**

| **Outcome** | **Marginal effect of IRS from multivariate logistic modelb** | | | **Causal effect of IRS using logistic model with inverse-probability weightsc** | | |
| --- | --- | --- | --- | --- | --- | --- |
| **Average estimated marginal effect** | **95% CI** | **p-value** | **Average estimated causal effect** | **95% CI** | **p-value** |
| Placental blood positive for malaria parasites by LAMPa | -17.3 | -24.5 – -10.1 | <0.001 | -17.0 | -24.5 – -9.5 | <0.001 |
| Any evidence of placental malaria by histopathologya | -5.5 | -16.6 – 5.6 | 0.333 | -8.6 | -19.7 – 2.5 | 0.128 |
| LBW (< 2500 gm) | -17.0 | -26.3 – -7.6 | <0.001 | -15.7 | -26.4 – -5.1 | 0.004 |
| Preterm delivery (< 37 weeks) | -15.0 | -22.8 – -7.2 | <0.001 | -17.8 | -26.2 – -9.4 | <0.001 |
| Fetal/Neonatal Deaths | -8.7 | -14.7 - -2.6 | 0.005 | -6.7 | -11.1 – -2.4 | 0.003 |

LBW: Low birth weight; aOR: adjusted odds ratio; IPW: inverse probability weighting; CI: Confidence interval

aIncludes all subjects with evaluable outcomes of interest

bAverage marginal effect: Estimated absolute risk difference between any IRS vs. no IRS, adjusted for gravidity, household wealth, presence of parasites at enrollment, gestational age study drugs started, and assigned IPTp treatment arm

cAverage causal effect: Estimated absolute risk difference between Any IRS vs. no IRS using inverse probability weighting
